# Supplementary material
Source: publisher figshare collection journal article supplement (https://sage.figshare.com/ndownloader/files/17822945)
Supplement: Supplementary file 1 [file 17822945]

Supplemental Table 1. Scale construction for the Quality of Life-AD

| Item                            | N         | Mean (SD)  | Item-rest correlation | 1-Factor Loading (n=242) |
|---------------------------------|-----------|------------|-----------------------|--------------------------|
| a. Physical health              | 257       | 2.33 (.84) | .52                   | .58                      |
| b. Energy                       | 257       | 2.22 (.86) | .55                   | .62                      |
| c. Mood                         | 257       | 2.69 (.84) | .52                   | .60                      |
| d. Living situation             | 257       | 2.71 (.86) | .56                   | .60                      |
| e. Memory                       | 257       | 2.56 (.91) | .33                   | .34                      |
| f. Family                       | 254       | 3.11 (.90) | .43                   | .47                      |
| g. Friends                      | 256       | 2.93 (.93) | .44                   | .50                      |
| h. Self as a whole              | 255       | 2.79 (.75) | .55                   | .63                      |
| i. Ability to do things for fun | 254       | 2.39 (.93) | .58                   | .64                      |
| j. Money                        | 249       | 2.39 (.95) | .48                   | .51                      |
| k. Life as a whole              | 256       | 2.88 (.81) | .57                   | .65                      |
|                                 |           |            |                       |                          |
| Cronbach's alpha for the scale  | .83       |            |                       |                          |
| Mean (SD) scale score (n=257)   | 2.6 (.53) |            |                       |                          |

*Note.* The items were preceded by the following text: "Now I'm going to ask you some questions about your quality of life. Please rate different aspects of your life using one of these words: poor, fair, good, or excellent. When you think about your life, there are different aspects, like your physical health, energy, family, money, and others. I'm going to ask you to rate each of these areas. We want to find out how you feel about your current situation in each area. If you're not sure what a question means, you can ask me about it. If you have difficulty rating any item, just give it your best guess." All item responses ranged from poor (1) to excellent (4). Overall scale score was constructed by taking the average of items with non-missing values. One resident did not respond to any of these items and has a missing value for the scale. All estimates (means, correlations, and factor loadings) were retrieved using unweighted data.

Supplemental Table 2. Scale construction for the Patient Health Questionnaire (PHQ-9)

| Item                                                                                                                                                                      | N         | Mean (SD)   | Item-rest correlation | 1-Factor Loading (n=238) |
|---------------------------------------------------------------------------------------------------------------------------------------------------------------------------|-----------|-------------|-----------------------|--------------------------|
| a. Little interest or pleasure in doing things                                                                                                                            | 253       | 1.08 (1.06) | .35                   | .44                      |
| b. Feeling down, depressed or hopeless                                                                                                                                    | 256       | .87 (1.02)  | .52                   | .63                      |
| c. Trouble falling asleep, staying asleep, or sleeping too much                                                                                                           | 256       | 1.06 (1.21) | .52                   | .55                      |
| d. Feeling tired or having little energy                                                                                                                                  | 253       | 1.34 (1.17) | .55                   | .60                      |
| e. Poor appetite or overeating                                                                                                                                            | 255       | .78 (1.08)  | .41                   | .48                      |
| f. Feeling bad about yourself – or that you’re a failure to have let yourself or your family down                                                                         | 254       | .67 (1.00)  | .54                   | .61                      |
| g. Trouble concentrating on things, such as reading the newspaper or watching television                                                                                  | 253       | .71 (.99)   | .52                   | .58                      |
| h. Moving or speaking slowly that other people could have noticed. Or, the opposite – being so fidgety or restless that you have been moving around a lot more than usual | 254       | .43 (.84)   | .41                   | .44                      |
| i. Thoughts that you would be better off dead or hurting yourself in some way                                                                                             | 254       | .20 (.57)   | .36                   | .44                      |
|                                                                                                                                                                           |           |             |                       |                          |
| Cronbach’s alpha for the scale                                                                                                                                            | 0.79      |             |                       |                          |
| Mean (SD) scale score (n=257)                                                                                                                                             | .80 (.61) |             |                       |                          |

*Note.* The items were preceded by the following text: “Now I would like to ask you some questions about your health and daily activities. I’m going to read a list and ask you how often you have been bothered by any of the following problems in the past two weeks. For these questions, use the responses not at all, several days, more than half the days, or nearly every day.” All item responses ranged from not at all (0) to nearly every day (3). Overall scale score was constructed by taking the average of items with non-missing values. One resident did not respond to any of these items and has a missing value for the scale. All estimates (means, correlations, and factor loadings) were retrieved using unweighted data.
